# Supplementary material
Source: PubMed Central journal article supplement (PMC4497803)
Supplement: NIHMS63872-supplement-supplemental.pdf [file NIHMS63872-supplement-supplemental.pdf]

Supplementary information for

## **The human IgE repertoire**

Elisabeth Gadermaier<sup>1</sup>, Mattias Levin<sup>2</sup>, Sabine Flicker<sup>1</sup>, Mats Ohlin<sup>2, \*</sup>

<sup>1</sup> Div. of Immunopathology, Dept. of Pathophysiology, Center for Pathophysiology, Infectiology and Immunology, Medical University of Vienna, Vienna, Austria

<sup>2</sup> Dept. of Immunotechnology, Lund University, Lund, Sweden

\* Corresponding author: Dr. Mats Ohlin, Dept. of Immunotechnology, Lund University, Medicon Village (Building 406), S-223 81 Lund, Sweden. Telephone: +46-46-2224322. E-mail: mats.ohlin@immun.lth.se

**Supplementary Table 1.** Examples of studies of human IgE repertoires.

| Condition of subjects                                          | Lymphocyte source; Number of donors / PCR products analysed | IgE-encoding repertoire - main finding                                                      | Reference |
|----------------------------------------------------------------|-------------------------------------------------------------|---------------------------------------------------------------------------------------------|-----------|
| Atopy                                                          | PBMC <sup>s</sup> ; 2/104                                   | Mutated sequences; Oligoclonal population                                                   | 1         |
| Atopic dermatitis                                              | PBMC; 3/19                                                  | Diverse repertoire (only IGHV5 analyzed in detail); oligoclonal repertoire                  | 2         |
| Atopic dermatitis                                              | PBMC; 2/29                                                  | Diverse                                                                                     | 3         |
| Peanut allergy                                                 | PBMC; 2/17                                                  | Overrepresentation by IGHV1; mutated                                                        | 4         |
| Allergic asthma                                                | Bronchial biopsy: 1/30                                      | Overrepresentation of IGHV5                                                                 | 5         |
| Atopic subjects (dermatitis, rhinitis, conjunctivitis, asthma) | PBMC; 10/ *                                                 | Diverse IGHV repertoire                                                                     | 6         |
| Atopic dermatitis                                              | PBMC; 1/51                                                  | Overrepresentation of IGHV6-1. These antibodies were multireactive.                         | 7         |
| Seasonal rhinitis                                              | PBMC; 3/62                                                  | Diverse, oligoclonal antigen-driven IgE                                                     | 8         |
| Infants with allergic disease                                  | PBMC; 3/50 (36 independent)                                 | Diverse repertoire; similar clones found in different individuals                           | 9         |
| Allergic rhinitis                                              | Nasal biopsy: 11/62                                         | Overrepresentation of IGHV5 and of mutations in FR                                          | 10        |
| Allergic rhinitis                                              | PBMC; 7/50                                                  | Diverse with respect to VH subgroup usage                                                   |           |
| Allergic rhinitis                                              | PBMC; 2/72                                                  | Diverse, mutated                                                                            | 11        |
| Atopic dermatitis; multiple allergies                          | PBMC; 1/76                                                  | Diverse but overrepresentation of IGHV4; mutated but little evidence of antigenic selection | 12        |
| Non-allergic                                                   | PBMC; 2/60                                                  | Diverse but with fewer mutations in comparison to IgE of allergic subjects or to IgG        |           |
| Atopic eczema (IgE > 10 IU/ml)                                 | PBMC; 14/†                                                  | Diverse with respect to VH subgroup usage. Mutated sequences. Oligoclonal repertoires.      | 13        |

|                                                                                                       |                     |                                                                                                                                                                                                                                                                                                         |    |
|-------------------------------------------------------------------------------------------------------|---------------------|---------------------------------------------------------------------------------------------------------------------------------------------------------------------------------------------------------------------------------------------------------------------------------------------------------|----|
| Allergic asthma (children)                                                                            | PBMC; 13/1366       | Diverse with respect to VH subgroup usage; oligoclonal population; highly mutated; evidence of antigenic selection                                                                                                                                                                                      | 14 |
| Atopic dermatitis (children)                                                                          | PBMC; 4/129         | Diverse with respect to VH subgroup usage; less oligoclonal and less mutated as compared to sequences from patients with allergic asthma; little evidence of antigenic selection                                                                                                                        |    |
| Chronic rhinosinusitis with nasal polyps                                                              | Nasal tissue; 4/217 | Diverse with respect to VH subgroup usage; mutated but with little evidence of antigenic selection                                                                                                                                                                                                      | 15 |
| Allergic subjects monosensitized to Bet v 1 analyzed over a period of four years of allergen exposure | PBMC; 3/152         | Diverse with respect to subgroup usage; mostly somatically mutated sequences but no evidence of increase of somatic mutations over time of allergen exposure. Similar IgE variable regions found over four years of allergen exposure in single individuals and in genetically non-related individuals. | 16 |
| Chronic rhinosinusitis                                                                                | Sinus mucosa; 4/50  | Diverse, mutated                                                                                                                                                                                                                                                                                        | 17 |
| Non-allergic fungal eosinophilic rhinosinusitis                                                       | Sinus mucosa; 4/36  | Diverse, mutated                                                                                                                                                                                                                                                                                        |    |
| Parasitized subjects, no history of allergic disease                                                  | PBMC; 14/118        | Diverse with respect to VH subgroup usage; mutated but with reduced evidence of antigenic selection                                                                                                                                                                                                     | 18 |

§ PBMC: peripheral blood mononuclear cells.

\* Southern blot based analysis – individual clones not analysed by sequencing.

† Major results reported from quantitative PCR-based assay. Only partial protein sequences available.

**Supplementary Table 2.** Basic outline of library construction and initial steps in the isolation of human allergen-specific antibody fragments using phage display technology.

- 
1. Isolation of samples (peripheral blood or tissue) containing B cells from allergic donors.
  2. Isolation of mRNA (often as total RNA)
  3. cDNA synthesis for instance using oligo-dT or, for the amplification of genes encoding the H chain V domains of IgE, primers specific for genes encoding constant domains of IgE [11].
  4. PCR-amplification of antibody encoding genes
    - a. Amplification of genes encoding the H chain V domains using primers that limit the amplification to those encoding IgE.
    - b. Amplification of genes (or creation of synthetic genes) encoding L chain V domains.
  5. Cloning of antibody V domain-encoding genes in a vector suitable for phage display technology.
  6. Transfection of library into F-pilus carrying *E. coli*.
  7. Production of phage stock displaying antibody fragment on filamentous phage.
  8. Selection of phages displaying allergen-specific antibody fragments using panning.
  9. Infection of selected phages into F-pilus carrying *E. coli*.
  10. Repeated selection (steps 7-9), if necessary.
  11. Primary screening of allergen-specific binders (either displayed on phage or as soluble proteins).
  12. Downstream analysis of productivity, reactivity and specificity as required.
-

**Supplementary Table 3.** Examples of factors that may affect the outcome of selection allergen-specific antibody fragments from combinatorial antibody libraries

|    | <b>Problem</b>                                                                                                                                                                                                                                     | <b>Effect</b>                                                                                                                                                                                                                                                                                                                                                                                                                           |
|----|----------------------------------------------------------------------------------------------------------------------------------------------------------------------------------------------------------------------------------------------------|-----------------------------------------------------------------------------------------------------------------------------------------------------------------------------------------------------------------------------------------------------------------------------------------------------------------------------------------------------------------------------------------------------------------------------------------|
| 1. | PCR primer design may affect the ability to incorporate certain antibody-encoding genes in a library.                                                                                                                                              | Certain V genes may not be efficiently amplified, skewing the library. Optimised primers and reaction conditions [19] should be employed.                                                                                                                                                                                                                                                                                               |
| 2. | Sequence features will affect display potential and thus potential for selection for instance through toxicity to <i>E. coli</i> .                                                                                                                 | Some fragments based on certain V genes will not be properly displayed or selected, a fact that may introduce artificial skewing of selected repertoire or complete failure of the selection process. Selection of appropriate bacterial strains, stringent control of recombinant protein production, co-expression of chaperone and steps that minimize advantages of fast-growing clones etc. may improve selection outcome [20-23]. |
| 3. | Display format (e.g. single chain fragment variable (scFv) or Fab) may affect selection efficiency.                                                                                                                                                | ScFv is often displayed more efficiently than Fab but dimerization and linker effects may affect scFv behaviour.                                                                                                                                                                                                                                                                                                                        |
| 4. | The degree of dependence of a H chain V domain on the L chain sequence for establishment of a specific binder will affect selection.                                                                                                               | Dependence of an H chain sequence on a certain L chain sequence for antigen binding will reduce the likelihood of selecting that binder.                                                                                                                                                                                                                                                                                                |
| 5. | Library size will determine the likelihood of recreating a specific binder through random combinations of H and L chain V domains.                                                                                                                 | Large libraries will be more likely than small libraries to recreate rare binders but they may also create new specificities that were not present in the patient.                                                                                                                                                                                                                                                                      |
| 6. | Selection conditions (factors such as but not limited to mode of antigen immobilization, antigen concentration, washing procedure and nature of antigen (glycosylation, folding, isoform composition etc.)) will greatly effect selection outcome. | Selection procedure will identify only a fraction of binders available in the library. Different sets of conditions may collect different sets of binders.                                                                                                                                                                                                                                                                              |

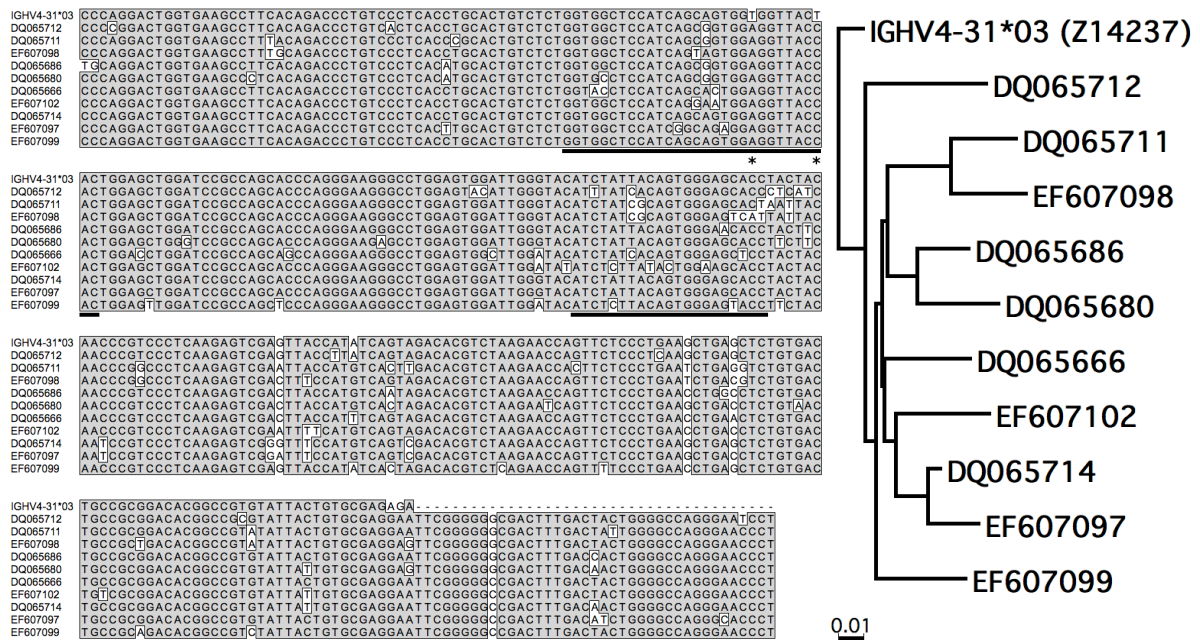

**Supplementary Figure 1.** Alignment of clonally related genes encoding the H chain V domain of IgE that have been derived from a library made from transcripts derived from a single allergic individual. All sequences have an origin in the IGHV4-31 germline gene and carry very similar CDRH3 sequence (with a maximum of 3 nucleotide differences from a consensus CDRH3 sequence). CDR are underlined. Note two mutations (indicated by stars) in CDRH1 that are conserved among all members of this set of clones. One of them is silent (GGT⇒GGA) while the other (TAC⇒CAC) results in a Y⇒H substitution). Nucleotides that aligned to primers during PCR amplification are not shown. Sequences were obtained either after sequencing of random PCR products (names starting with DQ) [11] or after selection for specificity for group 2 grass pollen allergen Phl p 2 by phage display technology [24] (names starting with EF). A phylogenetic tree, made using the Neighbour-Joining method, describing the potential relationship of the sequences is shown.

## References

1. Efremov DG, Batista FD, Burrone OR: Molecular analysis of IgE H-chain transcripts expressed in vivo by peripheral blood lymphocytes from normal and atopic individuals. *J Immunol* 1993;151:2195-2207.
2. van der Stoep N, van der Linden J, Logtenberg T: Molecular evolution of the human immunoglobulin E response: high incidence of shared mutations and clonal relatedness among epsilon VH5 transcripts from three unrelated patients with atopic dermatitis. *J Exp Med* 1993;177:99-107.
3. Tilgner J, Golembowski S, Kersten B, Sterry W, Jahn S: VH genes expressed in peripheral blood IgE-producing B cells from patients with atopic dermatitis. *Clin Exp Immunol* 1997;107:528-535.
4. Janezic A, Chapman CJ, Snow RE, Hourihane JO, Warner JO, Stevenson FK: Immunogenetic analysis of the heavy chain variable regions of IgE from patients allergic to peanuts. *J Allergy Clin Immunol* 1998;101:391-396.
5. Snow RE, Djukanovic R, Stevenson FK: Analysis of immunoglobulin E VH transcripts in a bronchial biopsy of an asthmatic patient confirms bias towards VH5, and indicates local clonal expansion, somatic mutation and isotype switch events. *Immunology* 1999;98:646-651.
6. Eibensteiner P, Spitzauer S, Steinberger P, Kraft D, Valenta R: Immunoglobulin E antibodies of atopic individuals exhibit a broad usage of VH-gene families. *Immunology* 2000;101:112-119.
7. Edwards MR, Brouwer W, Choi CH, Ruhno J, Ward RL, Collins AM: Analysis of IgE antibodies from a patient with atopic dermatitis: biased V gene usage and evidence for polyreactive IgE heavy chain complementarity-determining region 3. *J Immunol* 2002;168:6305-6313.
8. Davies JM, O'Hehir RE: VH gene usage in immunoglobulin E responses of seasonal rhinitis patients allergic to grass pollen is oligoclonal and antigen driven. *Clin Exp Allergy* 2004;34:429-36.
9. Bando Y, Shimizu A, Ra C (2004) Characterization of VHepsilon gene expressed in PBL from children with atopic diseases: detection of homologous VH1-69 derived transcripts from three unrelated patients. *Immunol Lett* 2004;94:99-106.

10. Coker HA, Harries HE, Banfield GK, Carr VA, Durham SR, Chevretton E, Hobby P, Sutton BJ, Gould HJ: Biased use of VH5 IgE-positive B cells in the nasal mucosa in allergic rhinitis. *J Allergy Clin Immunol* 2005;116:445-452.
11. Andréasson U, Flicker S, Lindstedt M, Valenta R, Greiff L, Korsgren M, Borrebaeck CAK and Ohlin M: The human IgE-encoding transcriptome to assess antibody repertoires and repertoire evolution. *J Mol Biol* 2006;362:212-227.
12. Dahlke I, Nott DJ, Ruhno J, Sewell WA, Collins AM: Antigen selection in the IgE response of allergic and nonallergic individuals. *J Allergy Clin Immunol* 2006;117:1477-1483.
13. Lim A, Luderschmidt S, Weidinger A, Schnopp C, Ring J, Hein R, Ollert M, Mempel M: The IgE repertoire in PBMCs of atopic patients is characterized by individual rearrangements without variable region of the heavy immunoglobulin chain bias. *J Allergy Clin Immunol* 2007;120:696-706.
14. Kerzel S, Rogosch T, Struecker B, Maier RF, Zemlin M: IgE transcripts in the circulation of allergic children reflect a classical antigen-driven B cell response and not a superantigen-like activation. *J Immunol* 2010;185:2253-2260.
15. Pratt E, Collins AM, Sewell WA, Harvey RJ: Antigen selection in IgE antibodies from individuals with chronic rhinosinusitis with nasal polyps. *Am J Rhinol Allergy* 2010;24:416-421.
16. Marth K, Novatchkova M, Focke-Tejkl M, Jenisch S, Jäger S, Kabelitz D, Valenta R: Tracing antigen signatures in the human IgE repertoire. *Mol Immunol* 2010;47:2323-2329.
17. Levin M, Tan LW, Baker L, Wormald PJ, Greiff L, Ohlin M: Diversity of IgE-encoding transcripts in sinus mucosa of subjects diagnosed with non-allergic fungal eosinophilic sinusitis. *Clin Exp Allergy* 2011;41:811-820.
18. Wang Y, Jackson KJ, Chen Z, Gaëta BA, Siba PM, Pomat W, Walpole E, Rimmer J, Sewell WA, Collins AM: IgE sequences in individuals living in an area of endemic parasitism show little mutational evidence of antigen selection. *Scand J Immunol* 2011;73:496-504.
19. Lim TS, Mollova S, Rubelt F, Sievert V, Dübel S, Lehrach H, Konthur Z: V-gene amplification revisited - An optimised procedure for amplification of rearranged human antibody genes of different isotypes. *N Biotechnol* 2010;27:108-117.



20. Bothmann H, Plückthun A: Selection for a periplasmic factor improving phage display and functional periplasmic expression. *Nat Biotechnol* 1998;16:376-380.
21. Kirsch M, Zaman M, Meier D, Dübel S, Hust M: Parameters affecting the display of antibodies on phage. *J Immunol Methods* 2005;301:173-185.
22. Derda R, Tang SK, Li SC, Ng S, Matochko W, Jafari MR: Diversity of phage-displayed libraries of peptides during panning and amplification. *Molecules* 2011;16:1776-1803.
23. Matochko WL, Ng S, Jafari MR, Romaniuk J, Tang SK, Derda R: Uniform amplification of phage display libraries in monodisperse emulsions. *Methods* 2012;58:18-27.
24. Persson H, Flicker S, Karbalaie Sadegh M, Valenta R, Greiff L and Ohlin M: A common idiotype in IgE and its relation to recognition of the grass pollen allergen Phl p 2. *Mol Immunol* 2008;45:2715-2720.
